# Supplementary material
Source: publisher figshare collection journal article supplement (https://acs.figshare.com/ndownloader/files/25673298)
Supplement: Supplementary file 1 [file 25673298]

# Supporting Information for

## Increasing capacity in disordered rocksalt cathodes by Mg doping

Peichen Zhong<sup>1,2</sup>, Zijian Cai<sup>1,2</sup>, Yaqian Zhang<sup>1,2</sup>, Raynald Giovine<sup>3</sup>, Bin Ouyang<sup>1,2</sup>, Guobo Zeng<sup>1,2</sup>, Yu Chen<sup>1,2</sup>, Raphaële Clément<sup>3</sup>, Zhengyan Lun<sup>1,2</sup>, and Gerbrand Ceder<sup>1,2</sup>

<sup>1</sup>Department of Materials Science and Engineering, University of California Berkeley, Berkeley, California 94720, United States

<sup>2</sup>Materials Sciences Division, Lawrence Berkeley National Laboratory, Berkeley, California 94720, United States

<sup>3</sup>Materials Department, University of California Santa Barbara, Santa Barbara, California 93106, United States

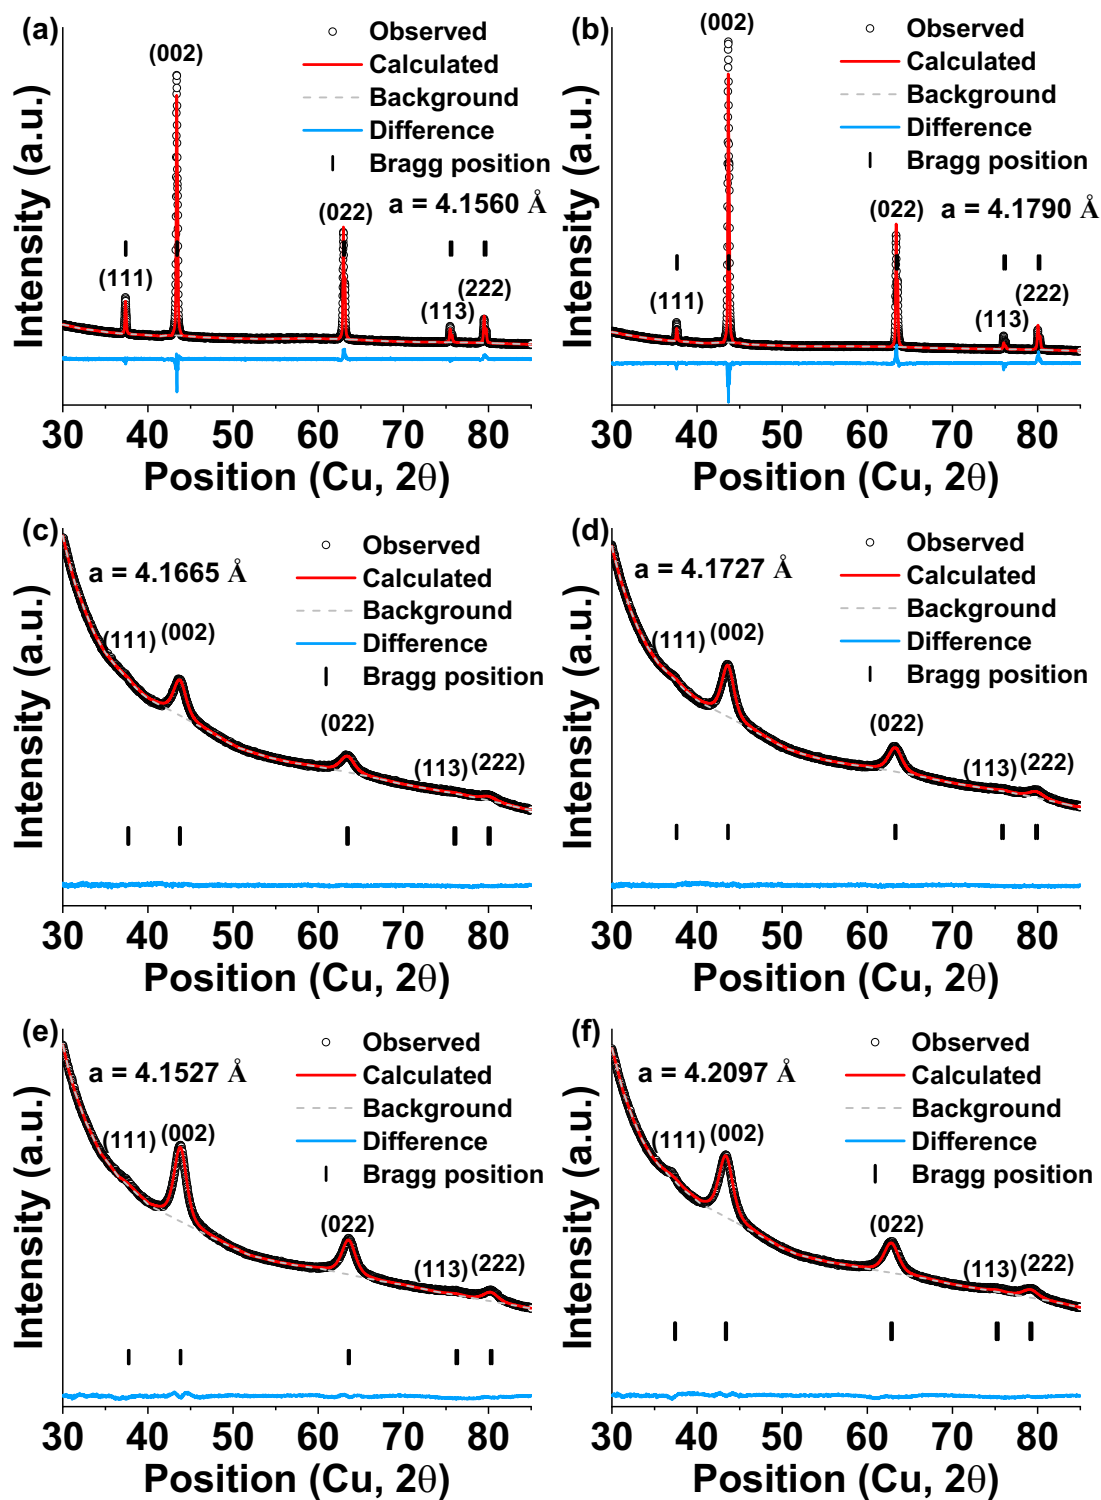

Supplementary Figure 1. XRD refinement of (a) LMTF, (b) LMMNF, (c) LMF, (d) LMMF, (e) ls-LMF, and (f) ms-LMF.

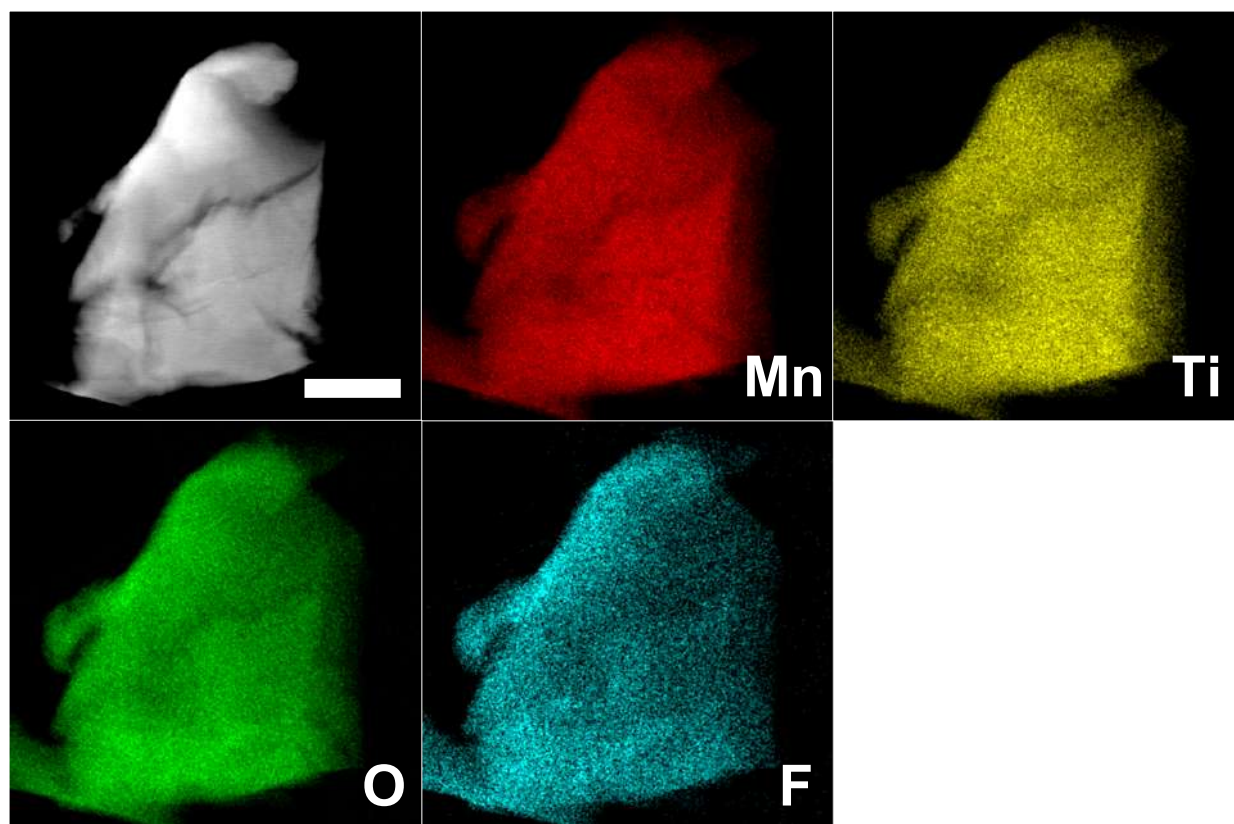

**Supplementary Figure 2. TEM-EDS mapping** of the element distribution in a representative particle of as-synthesized LMTF (scale bar, 300 nm)

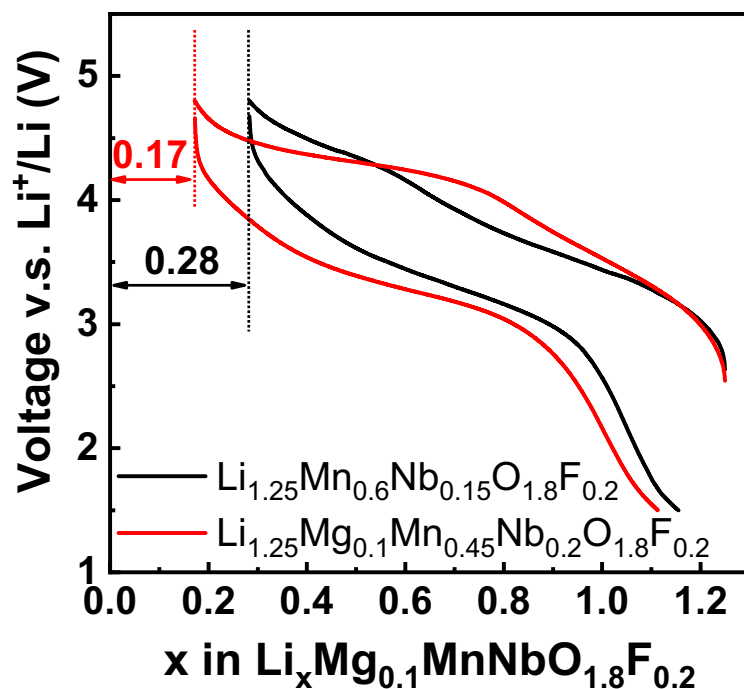

**Supplementary Figure 3. Electrochemical performance of Li-(Mg)-Mn-Nb-O-F compounds.** First cycle voltage profiles of  $\text{Li}_{1.25}\text{Mn}_{0.6}\text{Nb}_{0.15}\text{O}_{1.8}\text{F}_{0.2}$  (black) and  $\text{Li}_{1.25}\text{Mg}_{0.1}\text{Mn}_{0.45}\text{Nb}_{0.2}\text{O}_{1.8}\text{F}_{0.2}$  (red) within voltage window of 1.5 - 4.8V at 20  $\text{mA g}^{-1}$  at room temperature. The amount of remaining Li per f.u. at top of charge is shown in the figure.

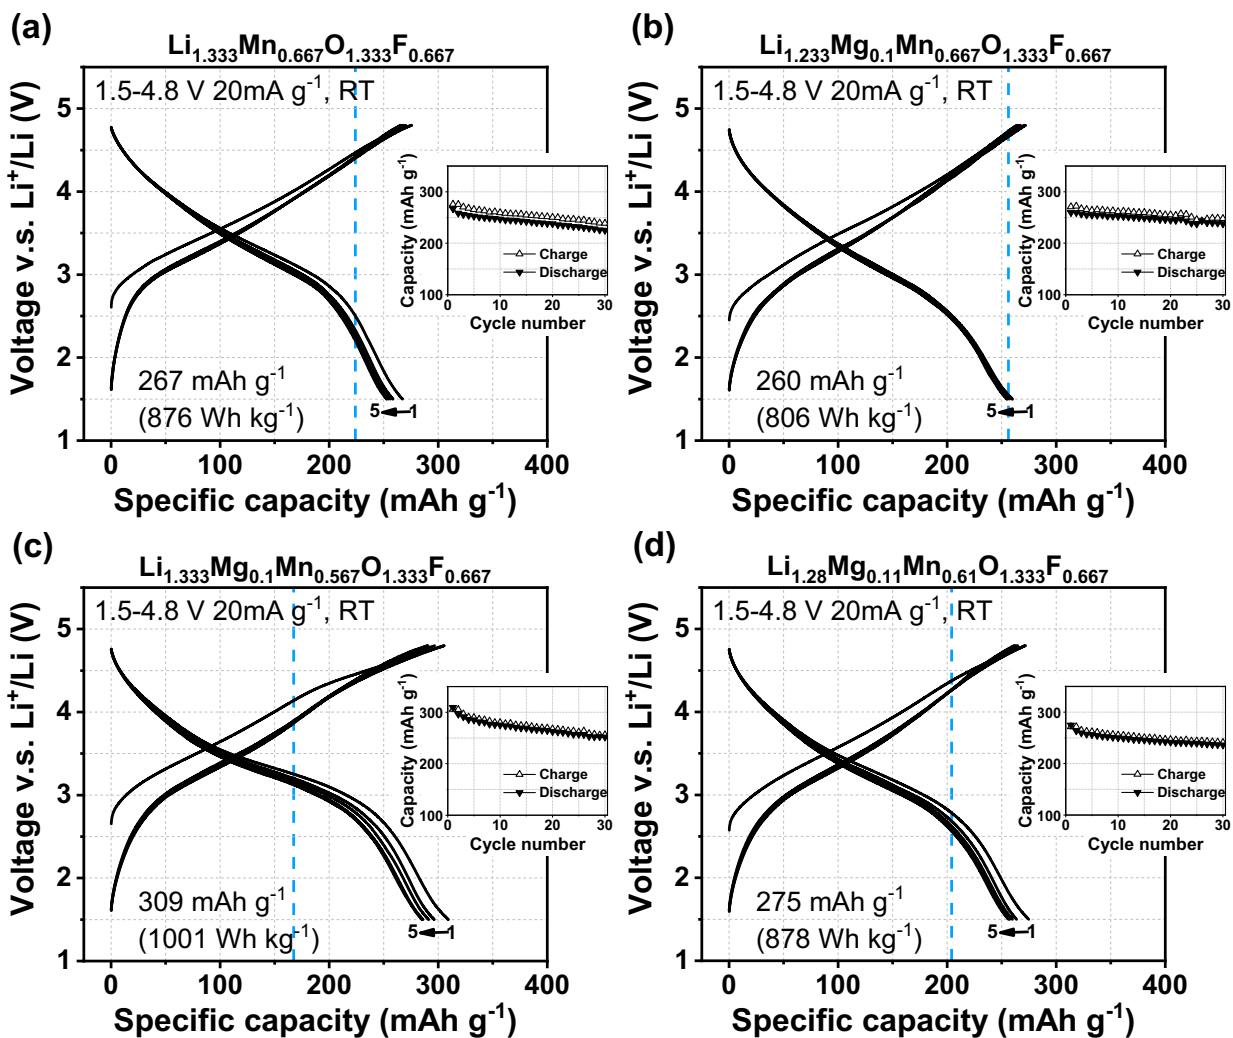

**Supplementary Figure 4. Electrochemical performance of Li-(Mg)-Mn-O-F compounds.** Voltage profile of the first 5 cycles and capacity retention of (a)LMF, (b) ls-LMF, (c) ms-LMF and (d) LMMF within voltage window of 1.5 - 4.8V at 20 mA g<sup>-1</sup> at room temperature. The blue dash lines indicate the theoretical Mn-redox capacity.

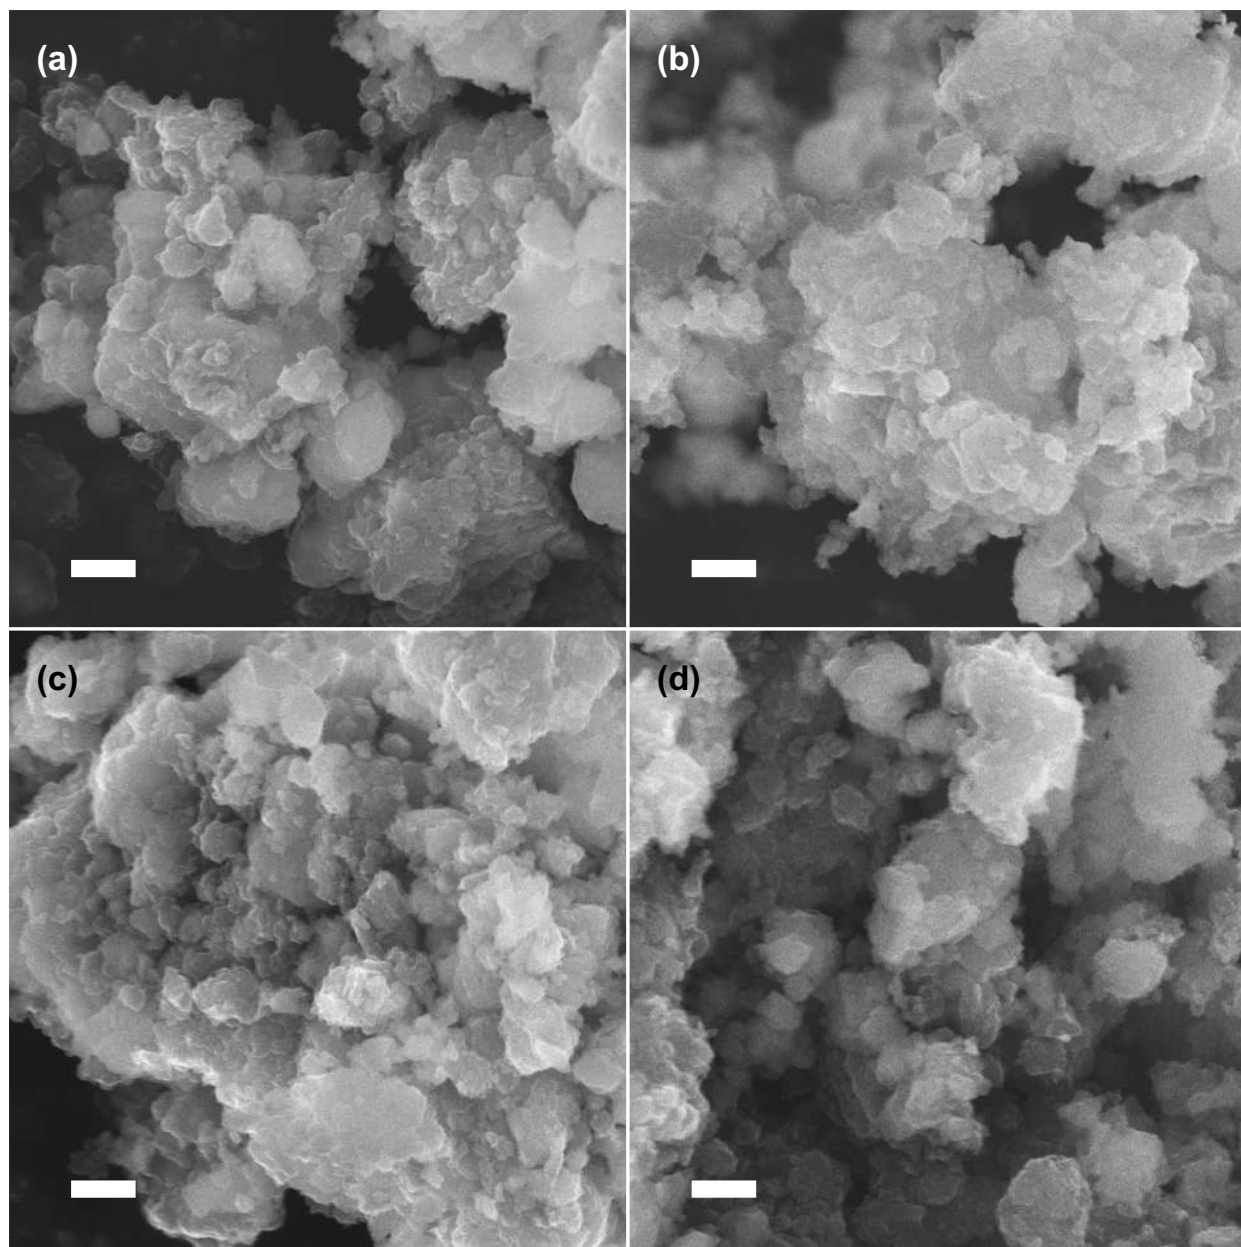

**Supplementary Figure 5.** Scanning electron microscope (SEM) images of **(a)** LMF, **(b)** LMMF, **(c)** ls-LMF and **(d)** ms-LMF that show the agglomeration of primary particles into secondary particles (scale bars, 400 nm).

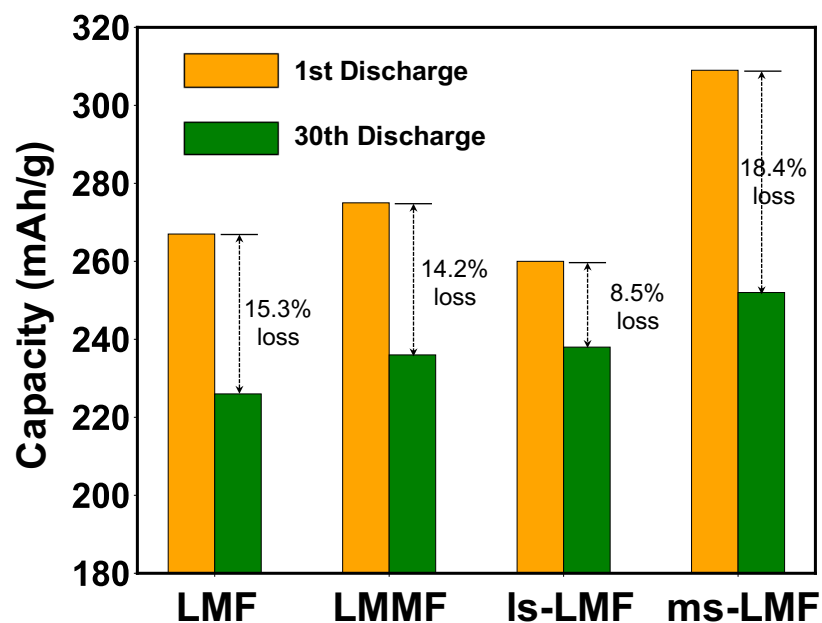

**Supplementary Figure 6. Cyclability comparison of LMF-based samples.** The first discharge (orange) and the 30th discharge (green) capacity of LMF, LMMF, ls-LMF and ms-LMF samples are shown. The percentage of capacity loss is labeled in figure.

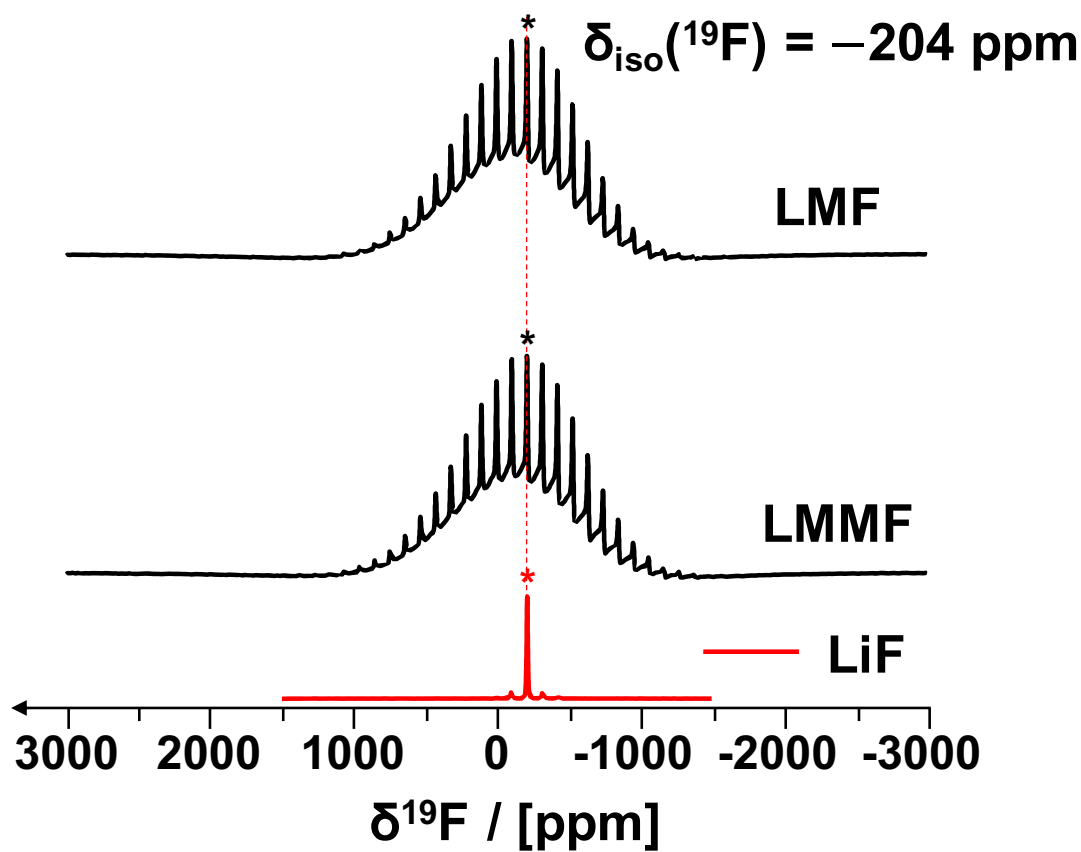

**Supplementary Figure 7.**  $^{19}\text{F}$  spin echo MAS NMR spectra of LMF and LMMF. For comparison,  $^{19}\text{F}$  spin echo spectra collected under similar experimental conditions ( $B_0 = 7.05 \text{ T}$ ) on a LiF powder sample are shown in red. The isotropic shift of the sharp resonance corresponding to  $^{19}\text{F}$  nuclei in LiF-like environments in the  $^{19}\text{F}$  NMR spectra is denoted with an asterisk. Spinning sidebands due to fast rotation of the samples during data acquisition are observed on either side of the isotropic signals.
